# Supplementary material for: A truncated variant of the ribosome-associated trigger factor specifically contributes to plant chloroplast ribosome biogenesis
Source: PubMed Central journal article supplement (PMC11731035; doi:10.1038/s41467-025-55813-1), 2025-01-13
Supplement: 41467_2025_55813_MOESM1_ESM.pdf [file 41467_2025_55813_MOESM1_ESM.pdf]

## Supplementary Information

### **A truncated variant of the ribosome-associated trigger factor specifically contributes to plant chloroplast ribosome biogenesis**

Fabian Ries<sup>1,2</sup>, Jasmin Gorlt<sup>1</sup>, Sabrina Kaiser<sup>3</sup>, Vanessa Scherer<sup>4</sup>, Charlotte Seydel<sup>5</sup>, Sandra Nguyen<sup>1</sup>, Andreas Klingl<sup>5</sup>, Julia Legen<sup>6</sup>, Christian Schmitz-Linneweber<sup>6</sup>, Hinrik Plaggenborg<sup>9</sup>, Jediael Z. Y. Ng<sup>7</sup>, Dennis Wiens<sup>7</sup>, Georg K. A. Hochberg<sup>7,8</sup>, Markus Räschle<sup>9</sup>, Torsten Möhlmann<sup>4</sup>, David Scheuring<sup>3</sup>, and Felix Willmund<sup>1,10\*</sup>

Author's institution(s)/affiliation(s):

<sup>1</sup> Molecular Genetics of Eukaryotes, University of Kaiserslautern, Paul-Ehrlich-Str. 23, 67663 Kaiserslautern, Germany.

<sup>2</sup> Present address: Institute of Systems Biotechnology, Saarland University, Campus A 1.5, 66123 Saarbrücken

<sup>3</sup> Plant Pathology, University of Kaiserslautern, Paul-Ehrlich-Str. 22, 67663 Kaiserslautern, Germany.

<sup>4</sup> Plant Physiology, University of Kaiserslautern, Paul-Ehrlich-Str. 22, 67663 Kaiserslautern, Germany.

<sup>5</sup> Plant Development, Ludwig-Maximilians-University Munich, Großhadernerstr. 2-4 82152 Planegg-Martinsried, Germany

<sup>6</sup> Molecular Genetics, Humboldt-University of Berlin, Philipp-Str. 13, 10115 Berlin, Germany.

<sup>7</sup> Max-Planck-Institute for Terrestrial Microbiology, Karl-von-Frisch-Str. 10, 35043 Marburg, Germany

<sup>8</sup> Evolution Biology & Synmikro, University of Marburg, Hans-Meerwein-Str 4, 35032 Marburg, Germany.

<sup>9</sup> Molecular Genetics, University of Kaiserslautern, Paul-Ehrlich-Str. 24, 67663 Kaiserslautern, Germany.

<sup>10</sup> Present address: Molecular Plant Sciences & Synmikro, University of Marburg, Karl-von-Frisch-Str. 14, 35032 Marburg, Germany.

**\*Corresponding author:** Felix Willmund (willmund@staff.uni-marburg.de)

## Supplementary Figures and Legends

Tree scale: 0.5 

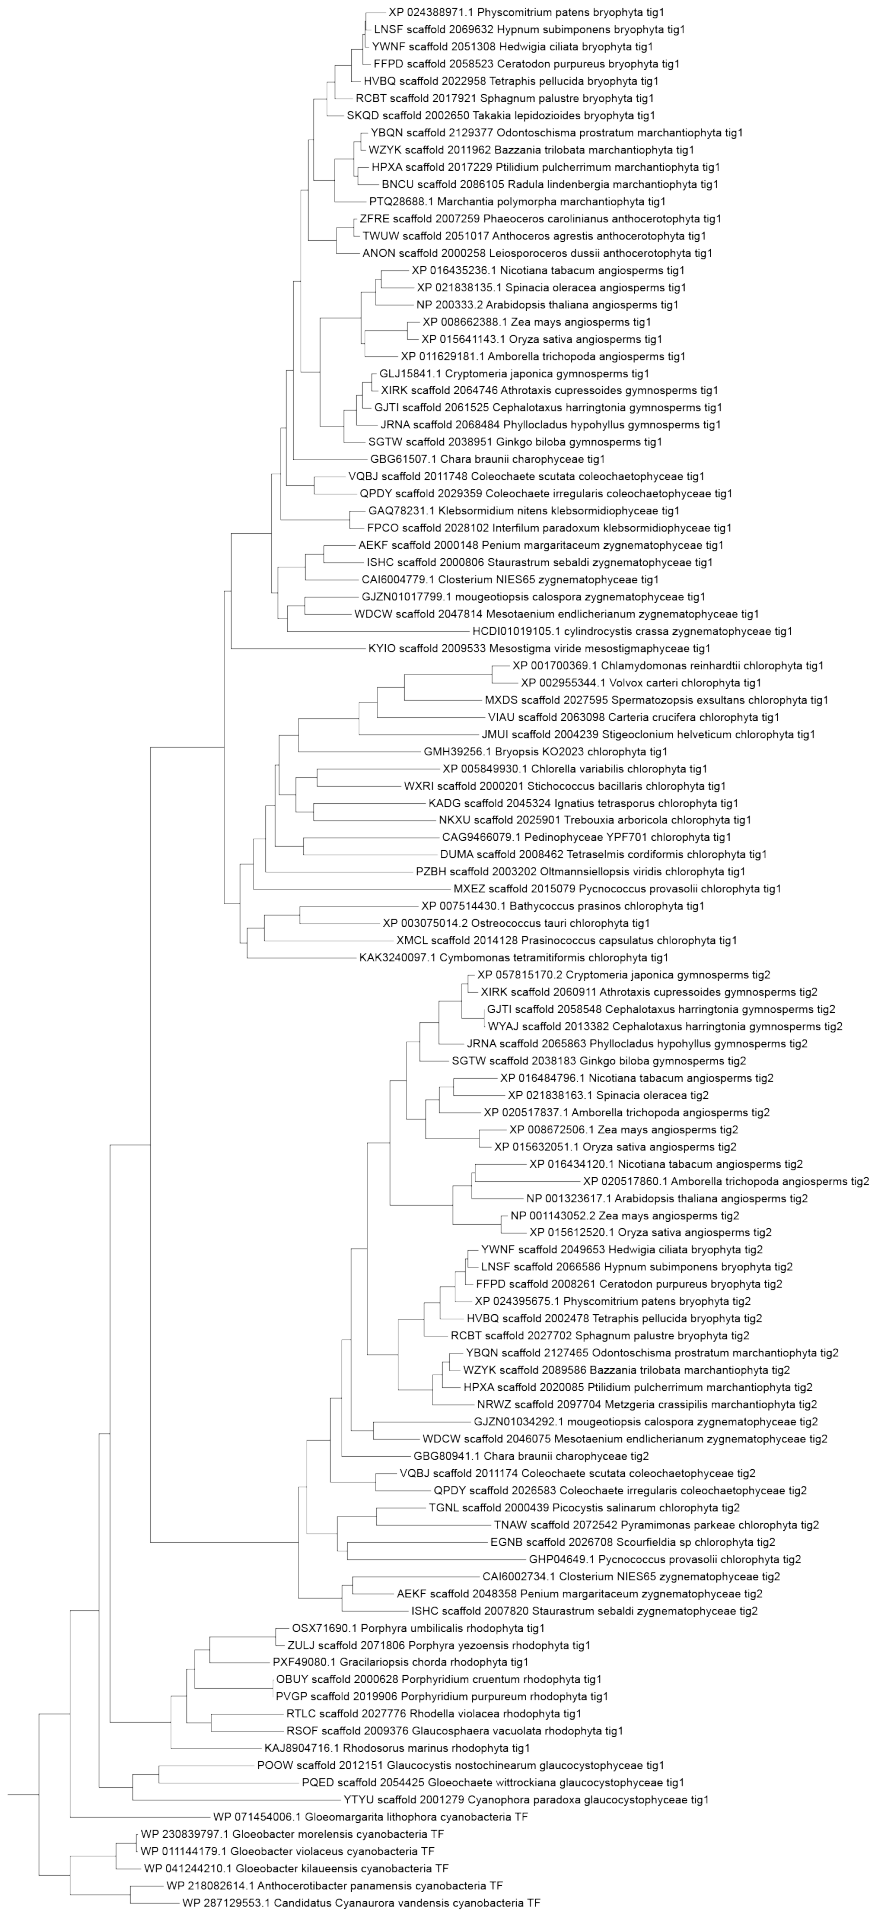

**Figure S1: Extended phylogenetic tree**

Full phylogenetic tree with all sequences (organism name and NCBI-identifier) to infer the evolutionary history of chloroplast trigger factor.



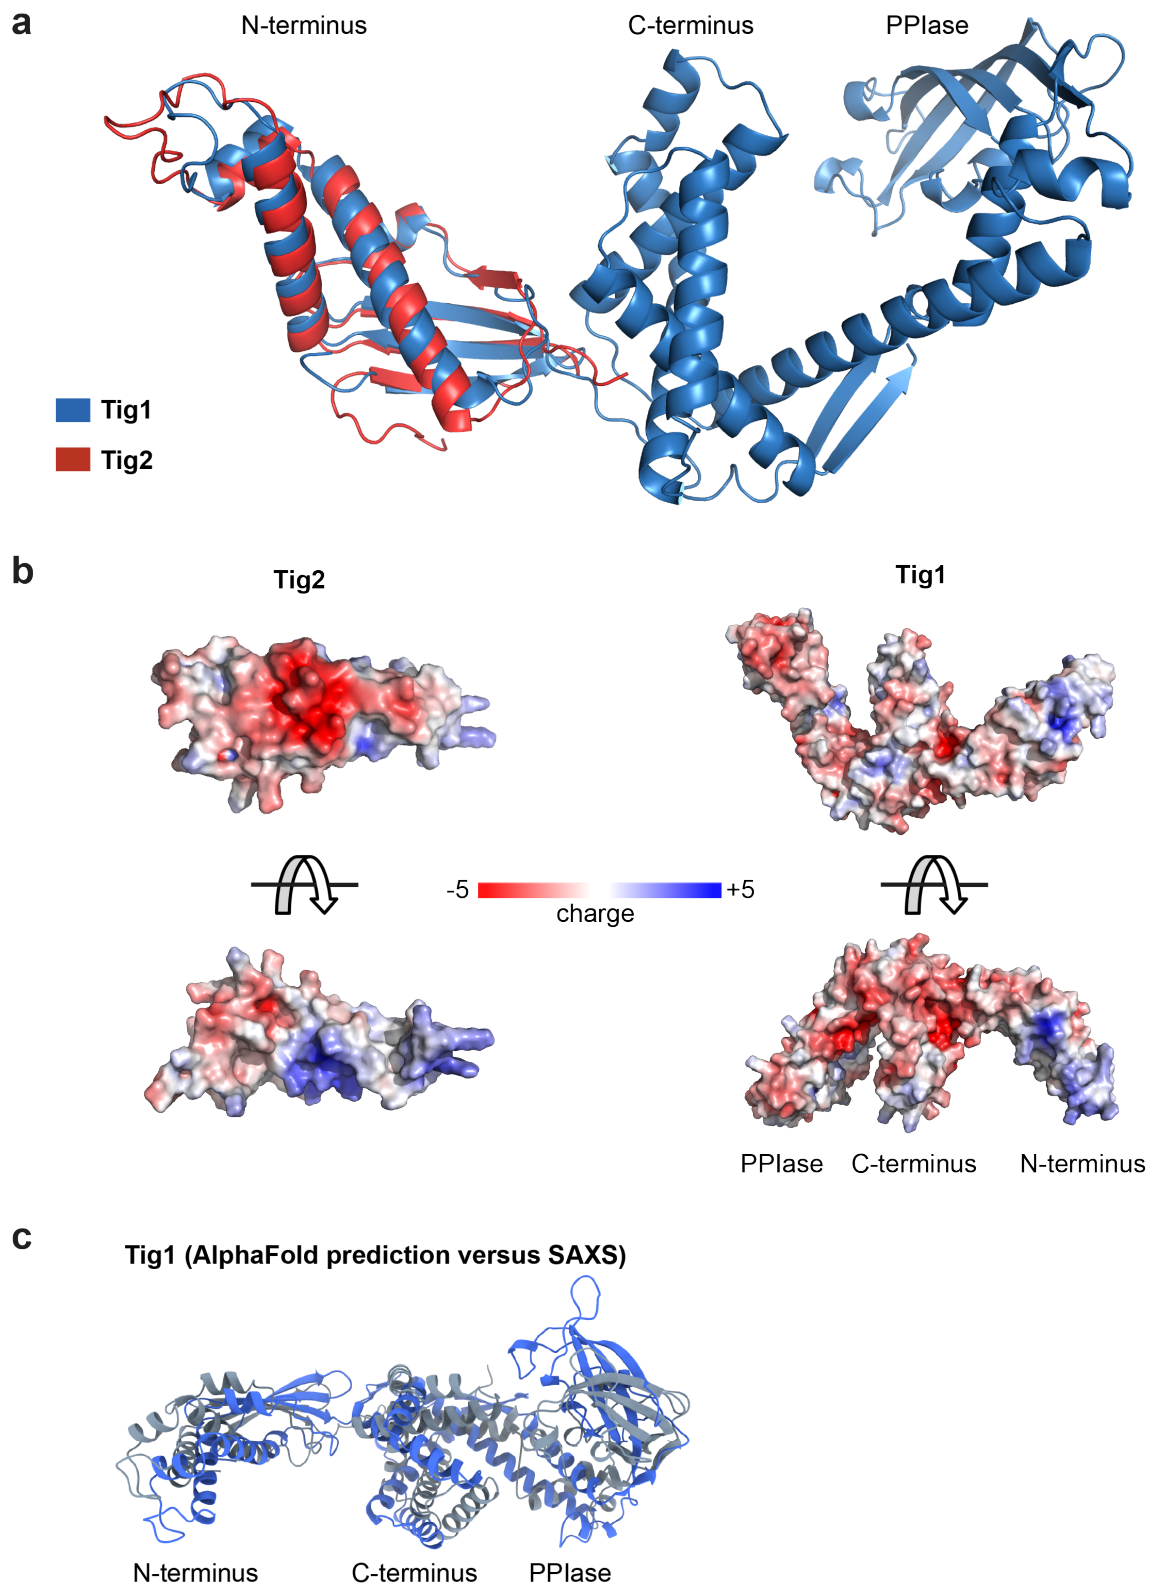

**Figure S2: Conformational comparison between Tig1 and Tig2**

**a** AlphaFold prediction of the conformation of the N-terminal domain of Tig1 (in blue) and the full-length sequences of Tig2 (in red). Conformations were superimposed by Chimera <sup>1</sup>. **b** Surface charge distribution of Tig1 and Tig2. **c** Comparison of the Tig1 AlphaFold prediction (blue) with the SREFLEX (version ATSAS 3.3.0; r14945, grey) model based on Arabidopsis Tig1 <sup>2</sup>.

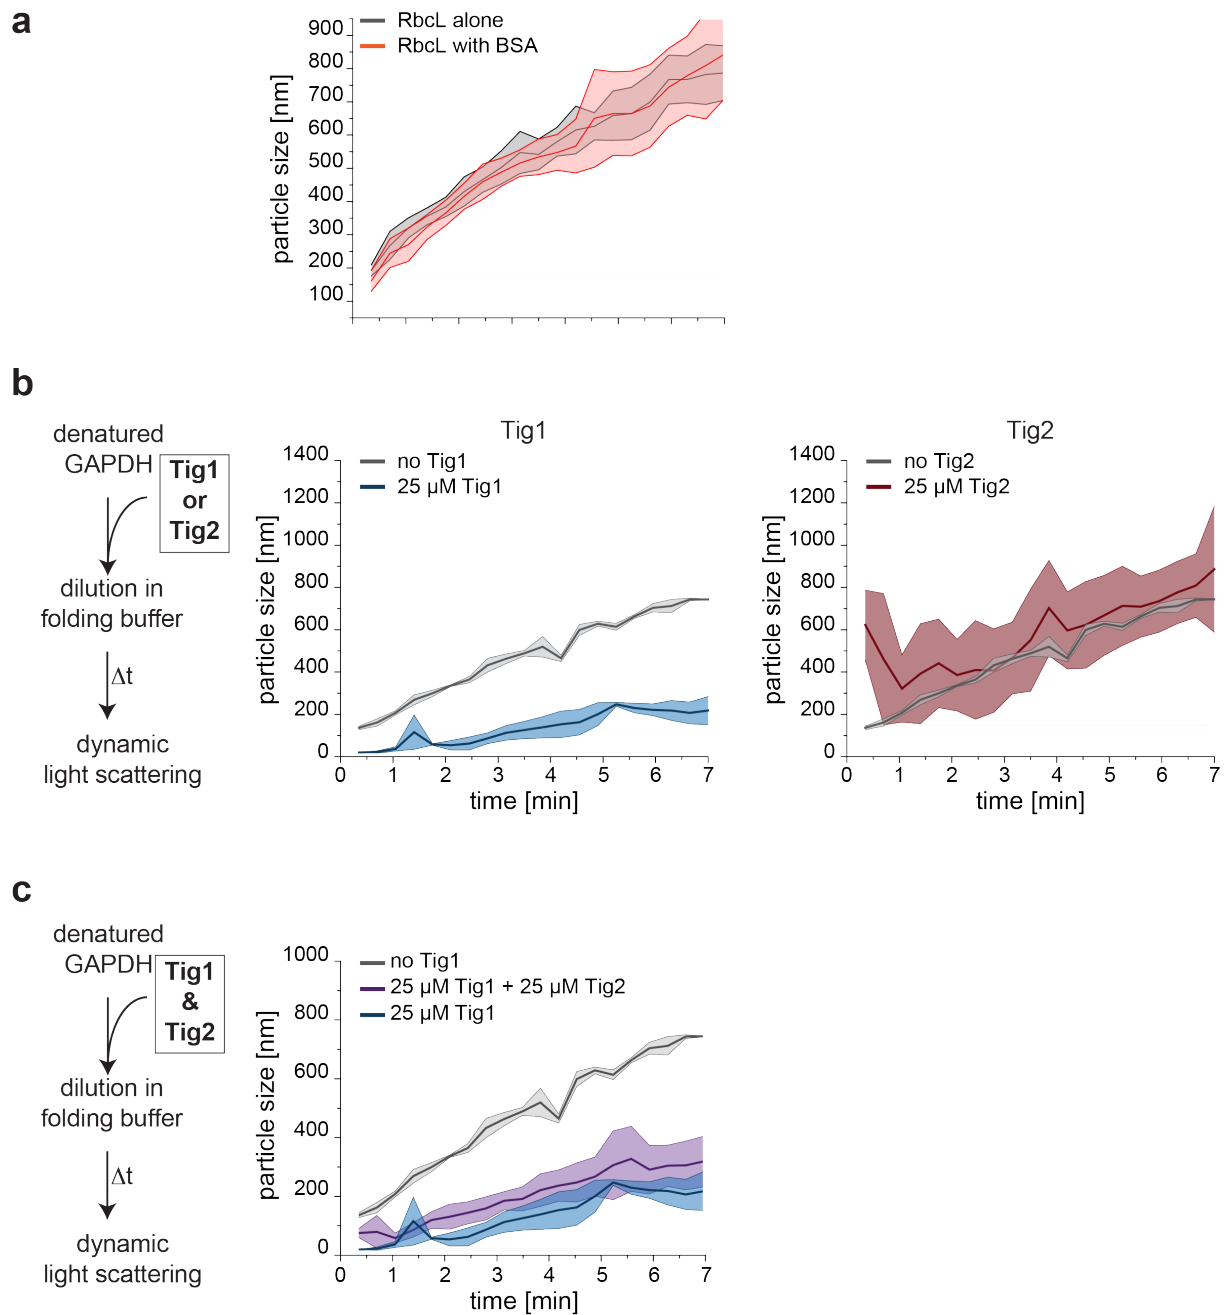

**Figure S3: Prevention of GAPDH aggregation is achieved by Tig1 but not by Tig2**  
 Chaperone activity assays and controls of Tig1 and Tig2. **a** Chemically denatured RbcL protein was diluted to 1  $\mu$ M in folding puffer in the absence or presence of 25  $\mu$ M purified BSA protein, respectively. Dynamic light scattering (DLS) was monitored over seven minutes at 25°C. **b** Left panel shows the experimental setup. Chemically denatured GAPDH protein was diluted to 2.5  $\mu$ M in folding puffer in the absence or presence of 25  $\mu$ M purified Tig1 or Tig2 protein, respectively. **c** Assay as in (b) in the presence of both chaperones. DLS was monitored over seven minutes at 25°C. Middle panel: Changes of hydrodynamic particle size (given as distribution widths of z-average diameters) in the absence or presence of Tig1. Right panel: DLS in the absence or presence of Tig2. Each data series represents the arithmetic mean values of 3-4 technical replicates and 1-2 biological replicates, deviations are displayed as ribbon plot.

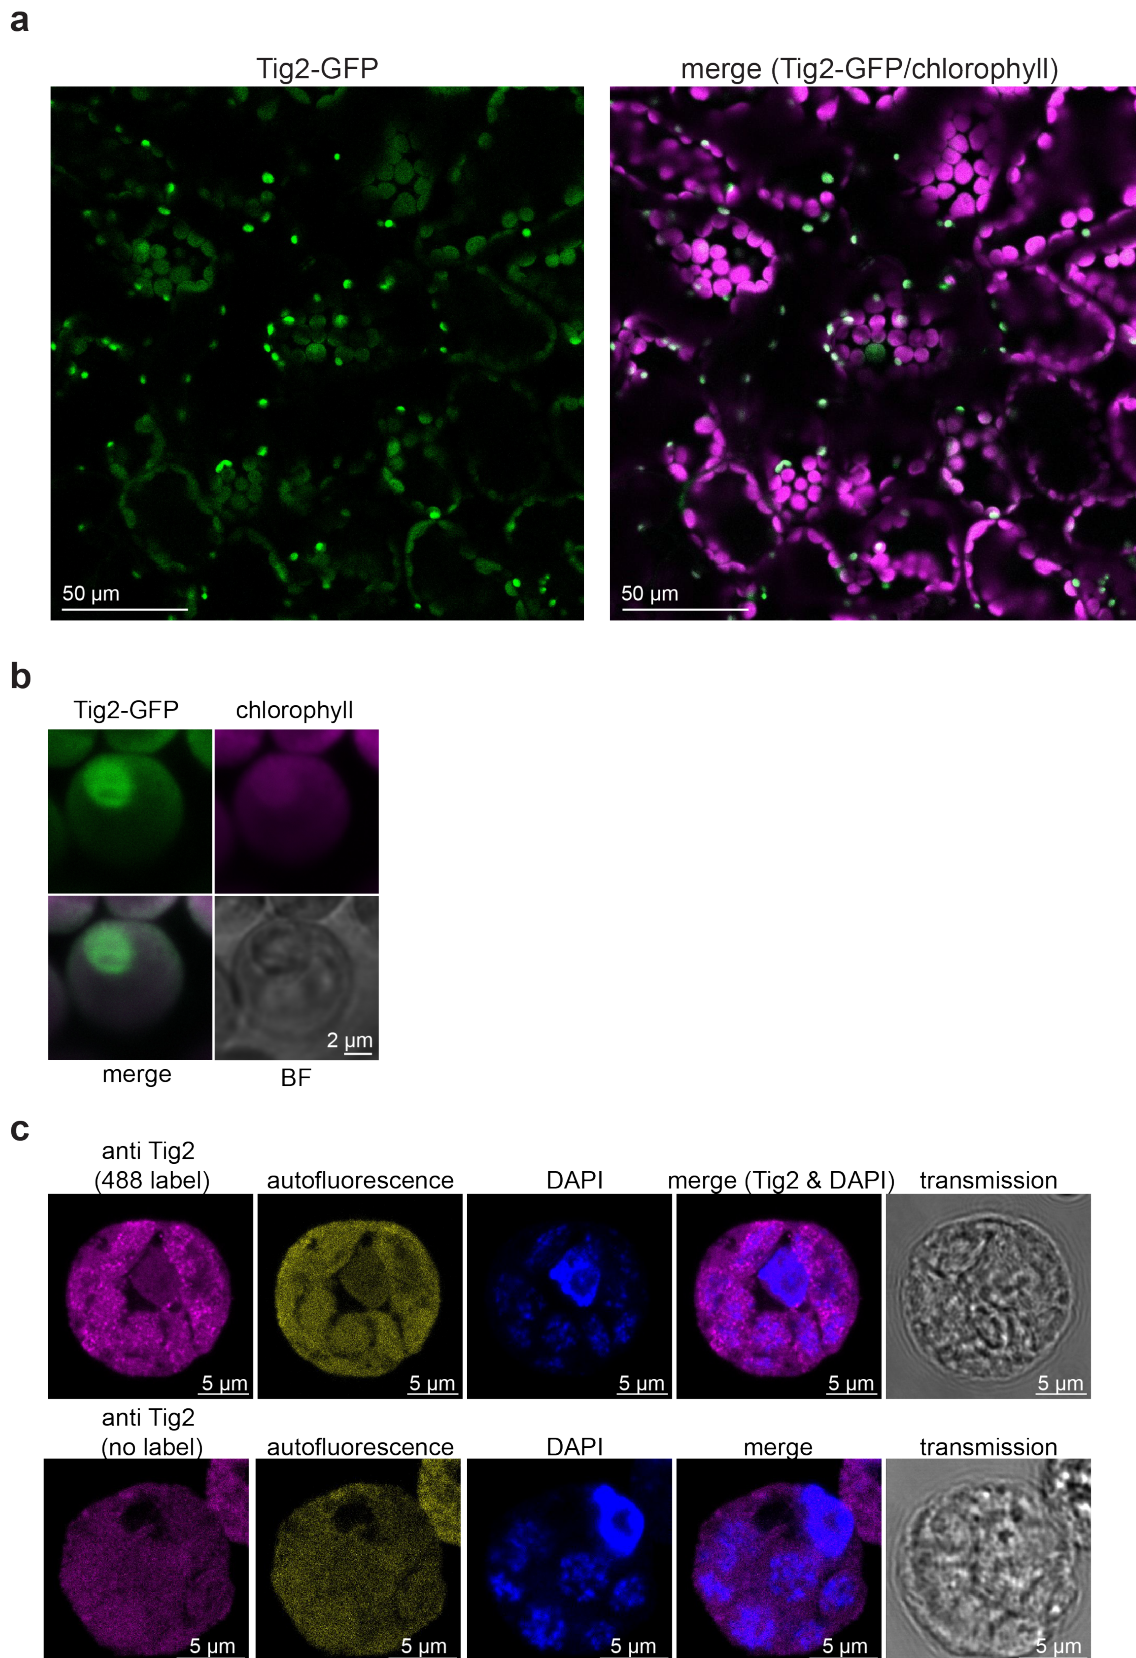

**Figure S4: Chloroplast distribution of Tig2-GFP**

**a** Overview confocal microscopy images of Tig2-GFP (green, left panel) and merge with chlorophyll autofluorescence (magenta, right panel) of Arabidopsis chloroplasts. Experiments were performed in two biological replicates with two independent lines. **b** Representative zoom-in image of a chloroplast with Tig2-GFP. **c** Immunofluorescence

microscopy of Arabidopsis protoplasts. Tig2 staining with antibody lacking the 488 label serves as negative control. Three independent biological replicates were done.

**Tig1**

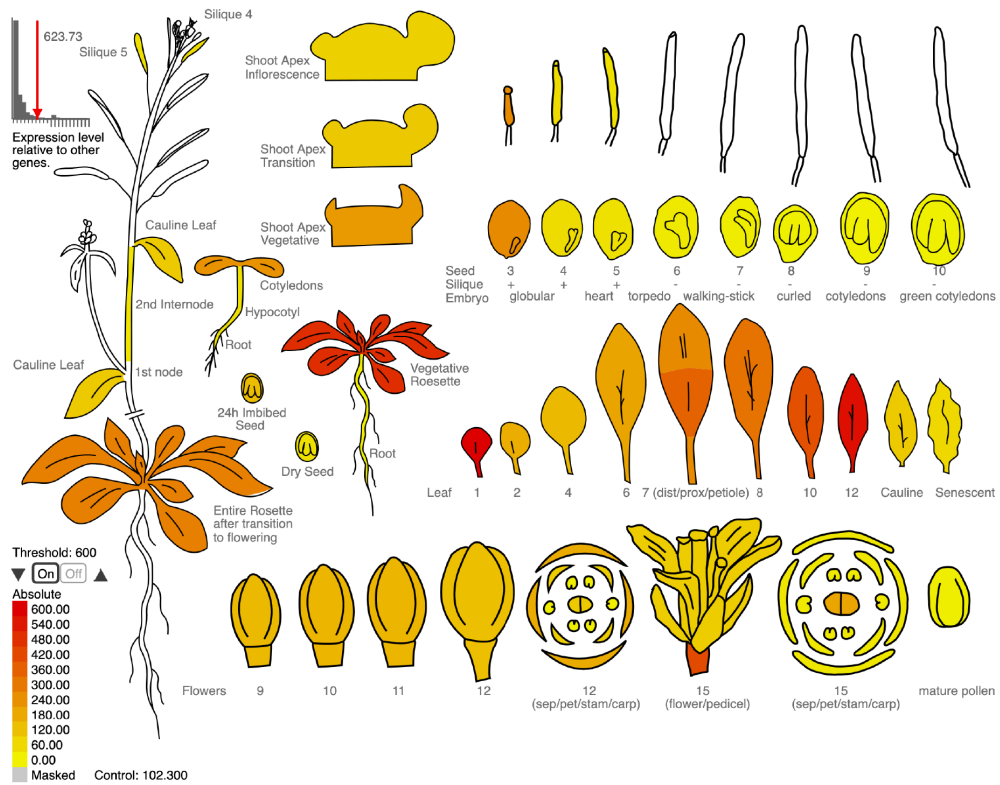

**Tig2**

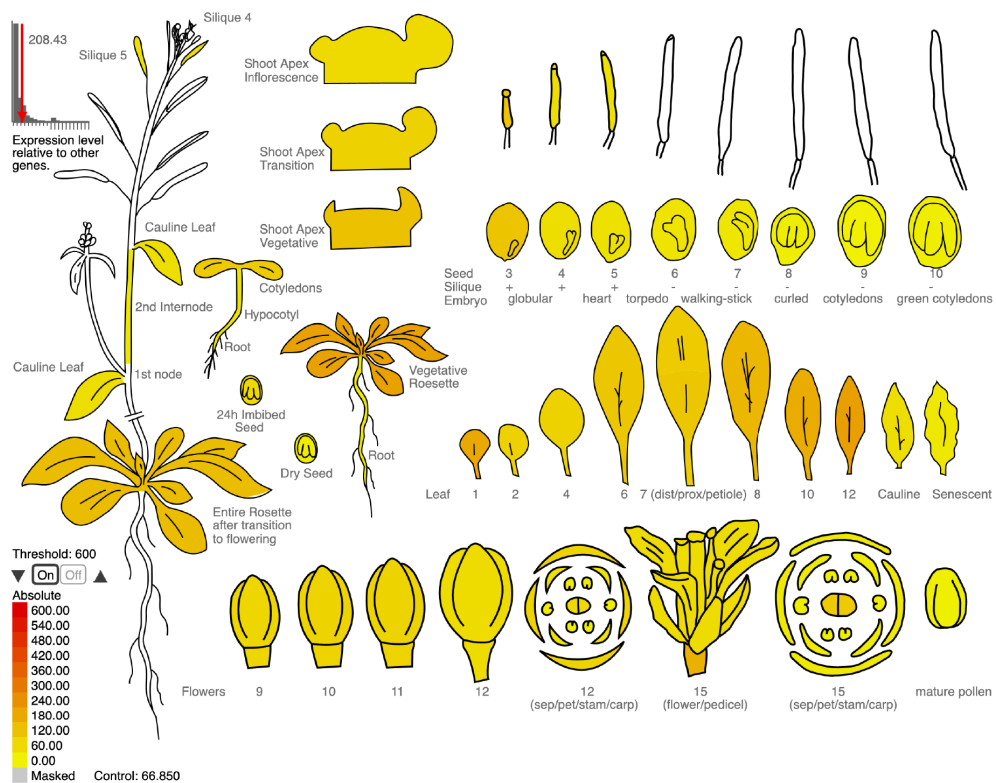

**Figure S5: Tissue-specific expression of *Tig1* and *Tig2* in Arabidopsis.**

Arabidopsis eFT Browser information<sup>3</sup> on tissue specific expression of *Tig1* (At5g55220, top panel) and *Tig2* (At2g30695, lower panel). This image was generated with the AtGenExpress eFP at <https://bar.utoronto.ca/eplant> by Waese et al<sup>3</sup>. Data were generated according to <sup>4,5</sup>, with red = strongest relative expression and yellow = lowest relative expression.



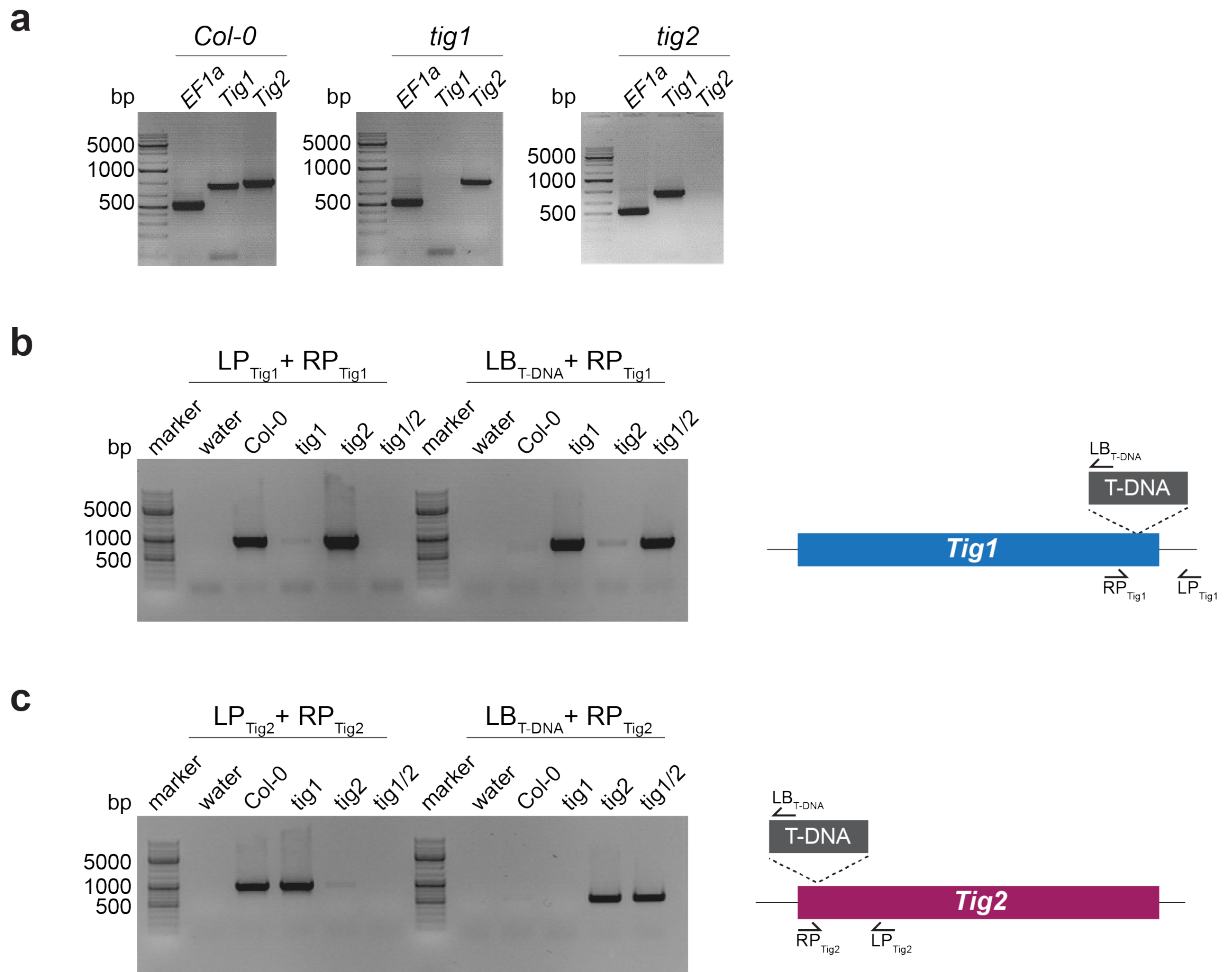

**Figure S6: Validation of locus disruptions within trigger factor mutants**

PCR over genomic DNA from Col-0, *tig1* and *tig2* mutants. **a** Agarose gels of 497 bp PCR product of *EF1 $\alpha$*  (At5g60390), 900 bp PCR product over *TIG1* (At5g55220) and 963 bp PCR product over *TIG2* (At2g30695). **b** Agarose gels of PCR confirming disruption of the *TIG1* locus (left) and insertion of the T-DNA cassette (right). **c** Agarose gels of PCR confirming disruption of the *TIG2* locus (left) and insertion of the T-DNA cassette (right). Cartoon represents position of the insertion cassette and the used primers. All primer sequences are listed in Table S2. *tig1* mutant was characterized previously<sup>6</sup>.

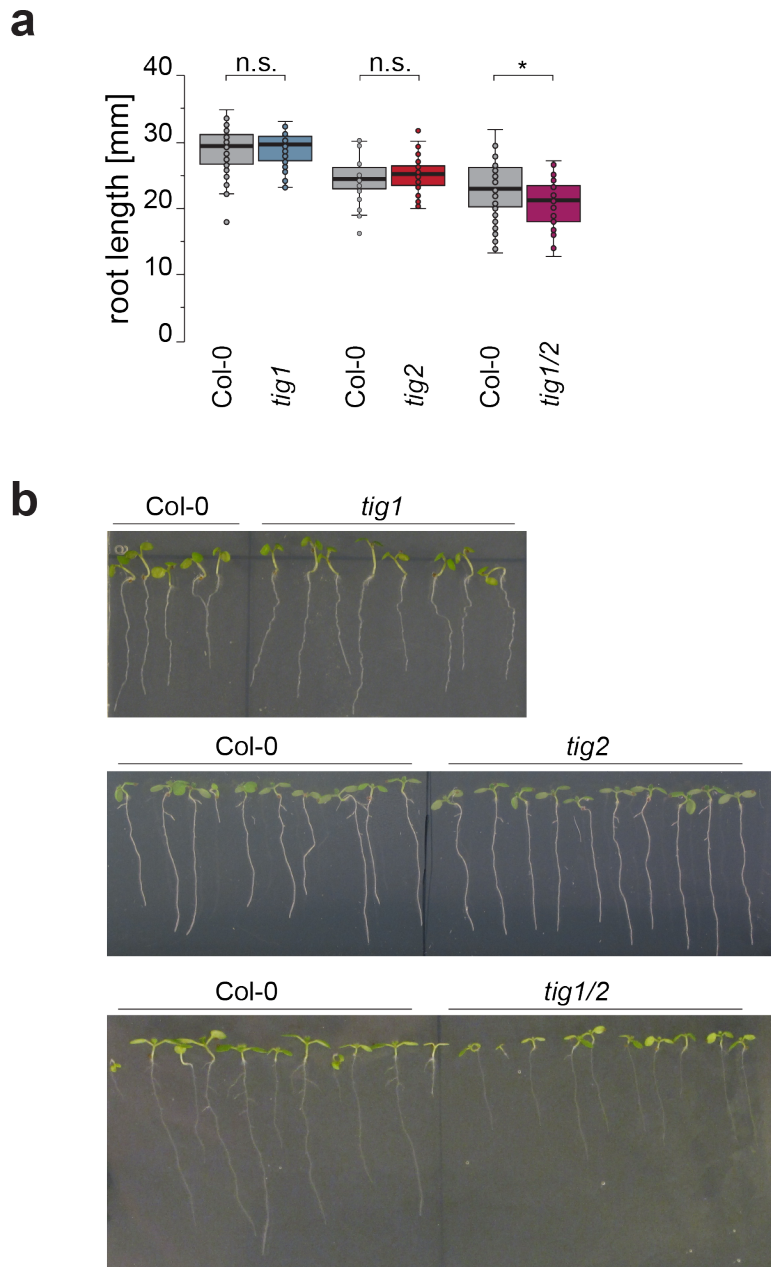

**Figure S7: Trigger factor double mutants have a reduced root growth**

**a** Root length of Arabidopsis wild-type (Col-0) and mutant lines, vertically grown on MS+ agar plates for 7 days after germination. Mutants are compared with the respective wild type, which were grown on the same plate. Boxplots show data of >37 individual plants grown in three independent biological replicates, respectively. Median is shown as solid line, box indicates lower and upper quartile, and the whiskers represent the data points that fall within 1.5 times the interquartile range (IQR) from the lower and upper quartiles. Any data point outside this range is considered as outlier. All samples are normally distributed after Kolmogorov-Smirnov, significant changes were determined by unpaired two-tailed Student's *t*-test. "n.s." = not significant, "\*" = significance with  $p = 0.02$ . **b** Representative images of vertically grown seedlings (7 DAG).

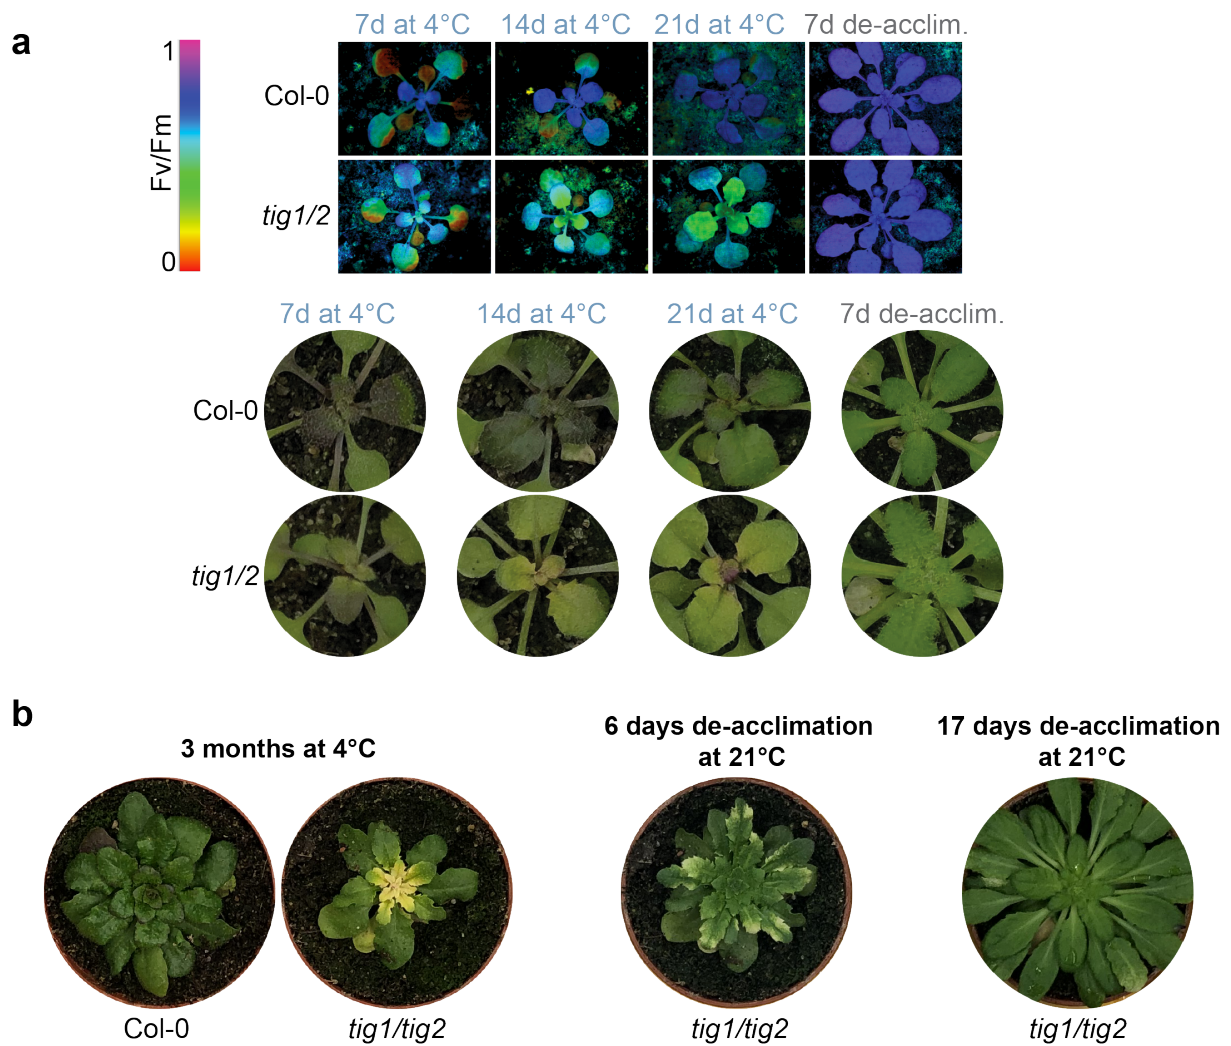

**Figure S8: Phenotypes of cold-exposed trigger factor double mutants**

**a** Top panel: Exemplary false-color images of Fv/Fm chlorophyll fluorescence of Col-0 and *tig1/2* lines. Lower panel: Images of respective rosettes. Corresponding maximum quantum yield of fluorescence (Fv/Fmax), representing activity of photosystem II are shown in Fig. 3e. **b** Reversible cold defect of Arabidopsis Col-0 and *tig1/2* plants, kept for three months at 4°C and subsequent de-acclimation for 6 days at 21°C. Images are representative for biological replicates.



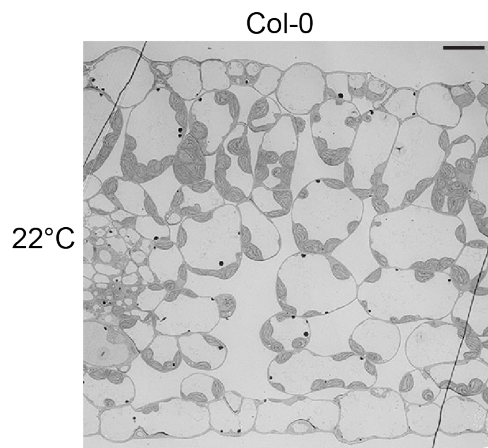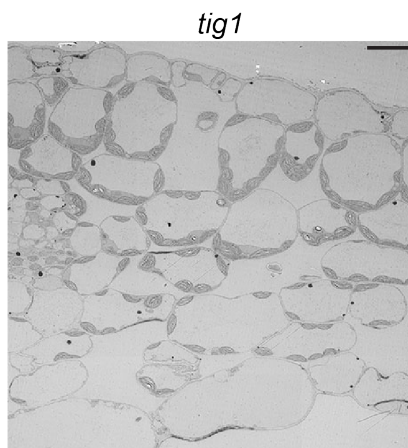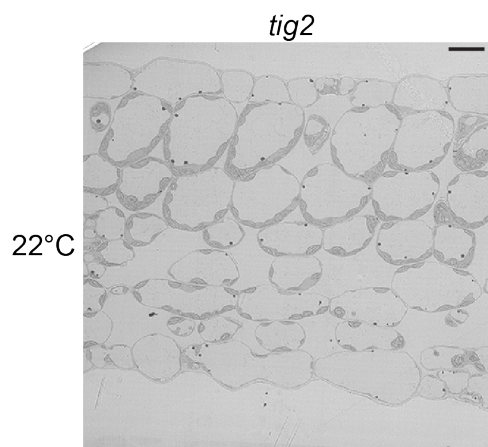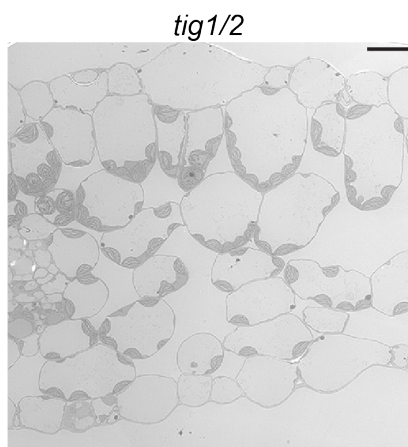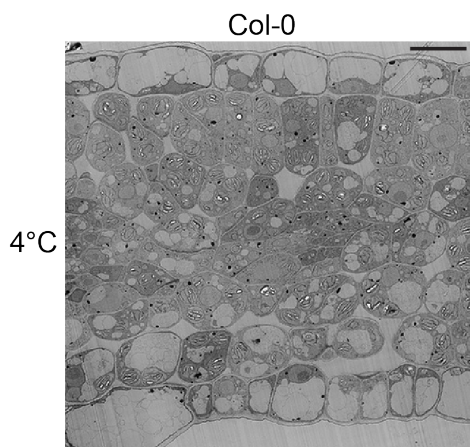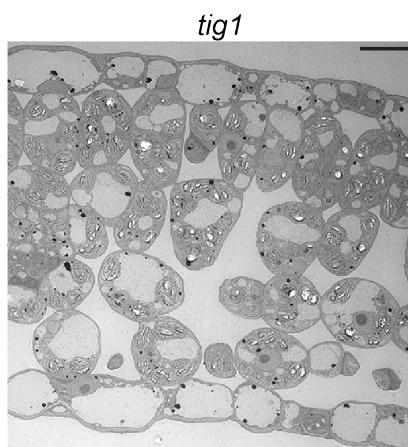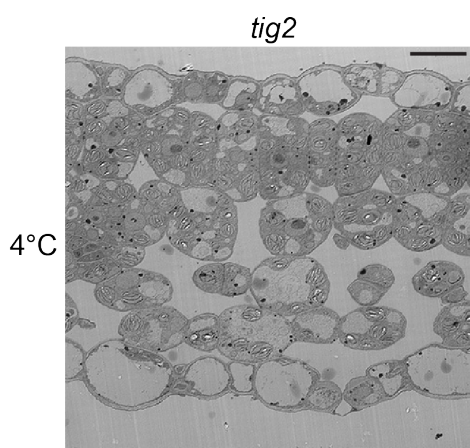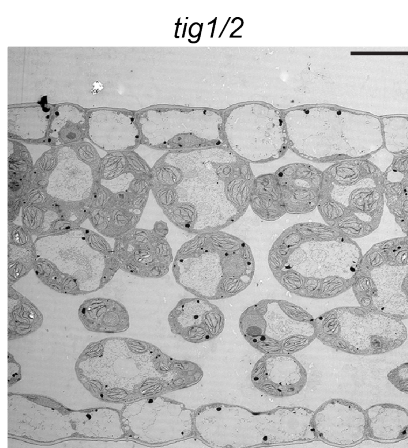

**Figure S9: Leaf cross-sections of Col-0 and trigger factor mutants**

Transmission electron micrographs of ultra-thin sections (60 nm) from young leaves of 35 days old *Arabidopsis* plants. Plants were grown for 21 days at room temperature (22°C) and were kept for additional 14 days at these temperatures or were transferred for 14 days to 4°C. Leaf tissue from top to bottom: upper epidermis, palisade mesophyll, spongy mesophyll, lower epidermis. Scale bar represents 10 µm.

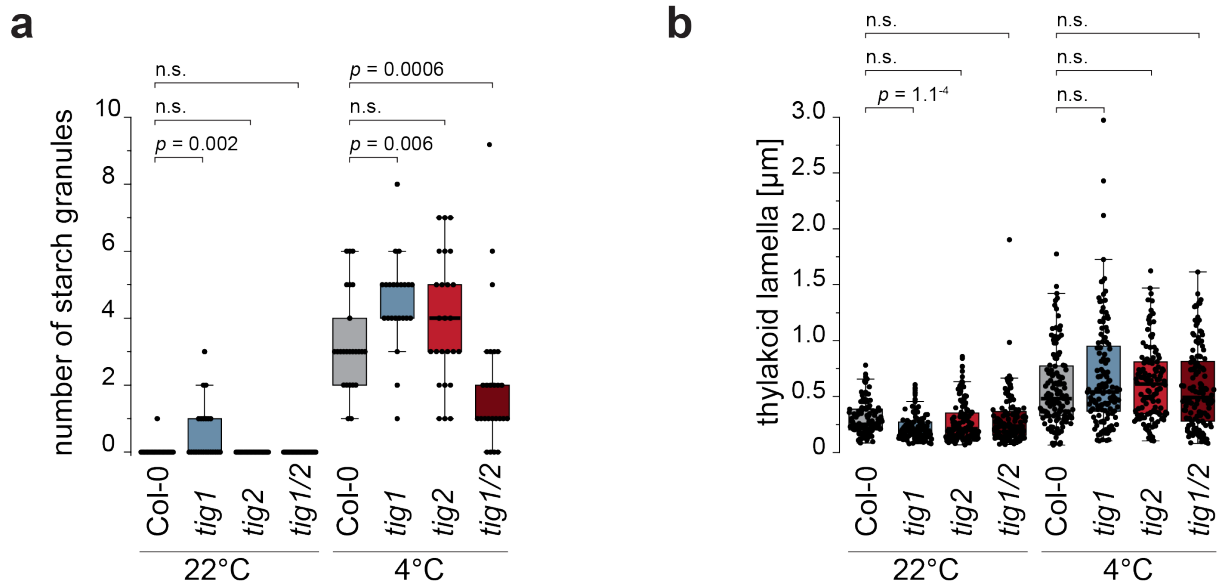

**Figure S10: Starch granules and stroma lamellae length of Col-0 and trigger factor mutants**

**a** Quantification of electron microscopy images (Fig. 4). Number of chloroplast-localized starch granules, derived from random quantification of 25 chloroplasts per *Arabidopsis* line and condition, respectively. **b** Length of stroma lamellae thylakoid membrane section determined for 5 sections in 25 chloroplasts per *Arabidopsis* line and condition, respectively. *P*-values of unpaired two-tailed Student's *t*-test are given. "n.s." = not significant. For all box plots, median is shown as solid line, box indicates lower and upper quartile, and the whiskers represent the data points that fall within 1.5 times the interquartile range (IQR) from the lower and upper quartiles. Any data point outside this range is considered as outlier.

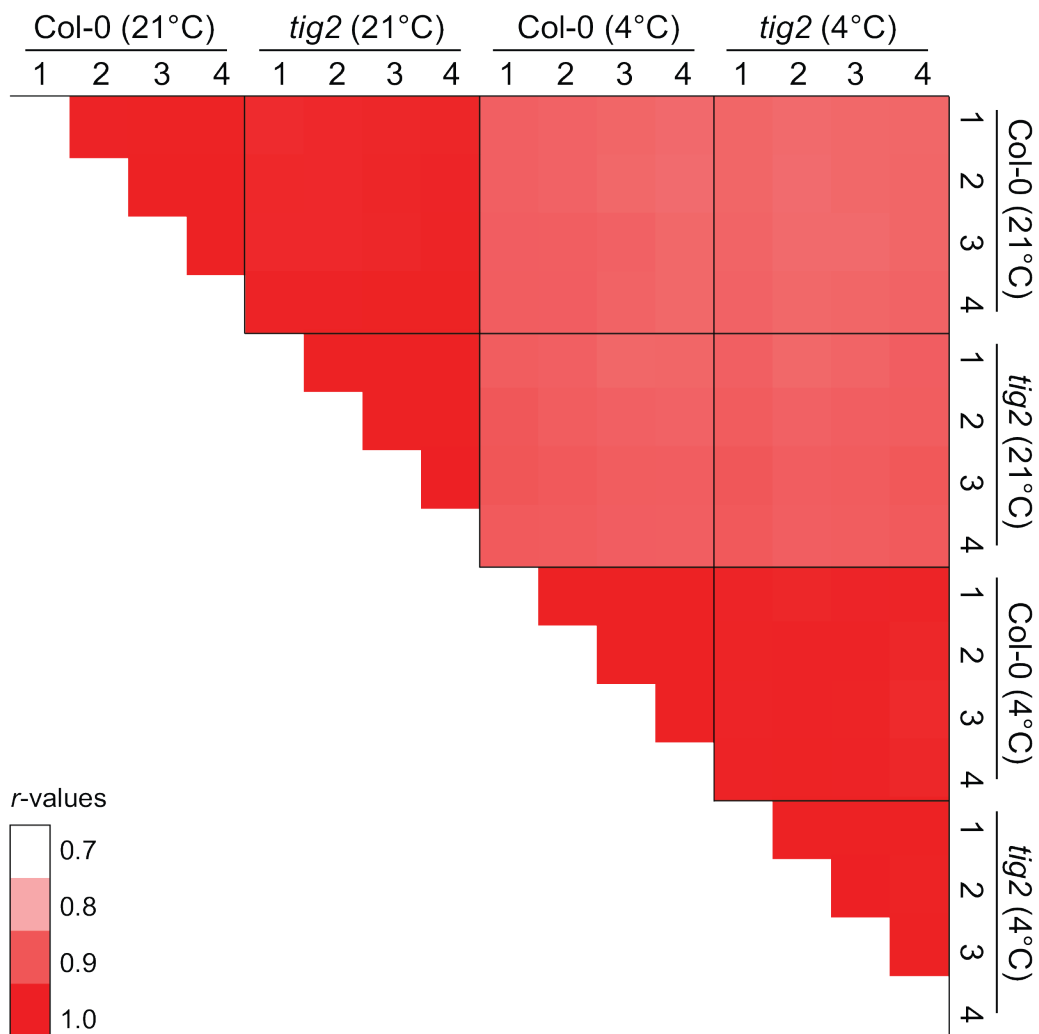

**Figure S11: Reproducibility of proteomic data**

Pearson correlation *r*-values between all whole-proteome mass spectrometry experiments from untreated and cold-treated Col-0 and *tig2* lines. Correlation is based on filtered log<sub>2</sub>-transformed LFQ values set.

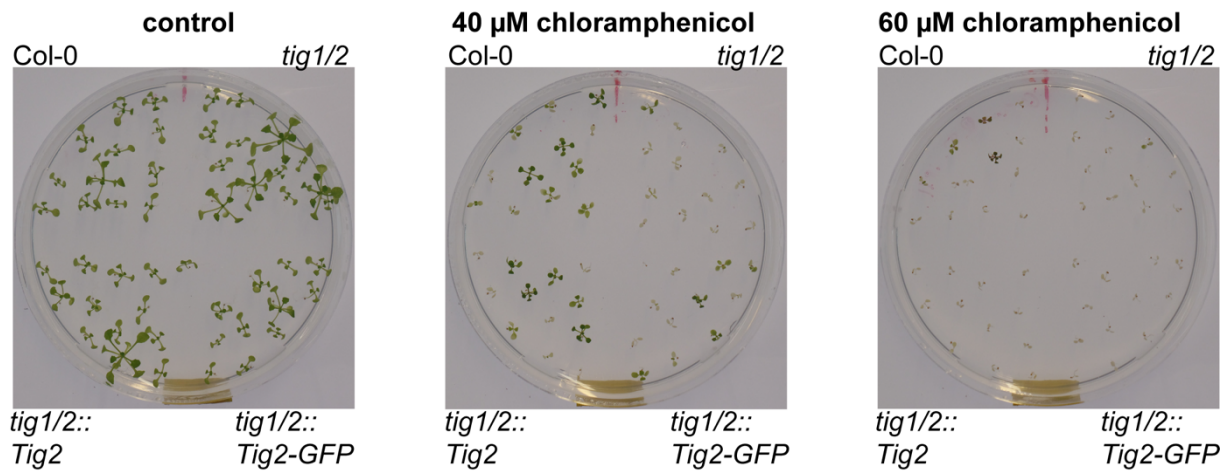

**Figure S12: Reduced ribosome capacity in *tig2* mutants**

Seedlings were grown for 10 days (DAG) on plates with 40 or 60  $\mu\text{M}$  of chloramphenicol. Plates without chloramphenicol serve as control.

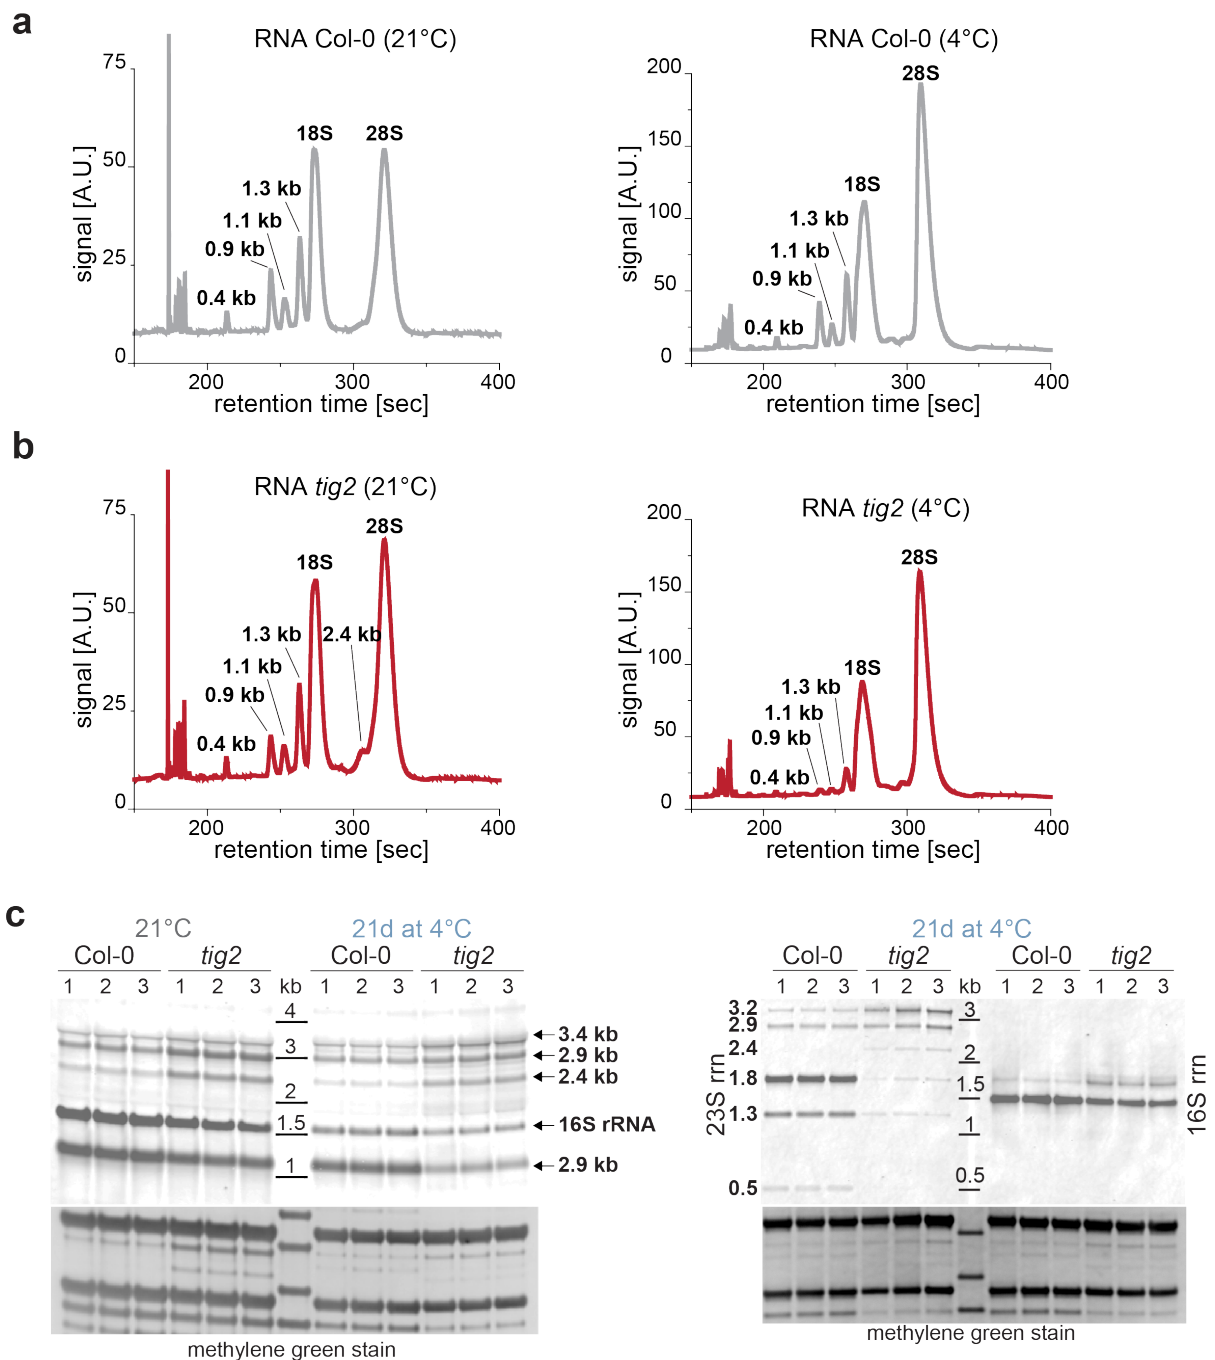

**Figure S13: rRNA quality from Col-0 and *tig2* samples**

Dominant rRNA fragments of isolated RNA from samples collected of Col-0 (**a**) and *tig2* mutant lines (**b**), exposed for the indicated times at 21°C and 4°C. **c** Top panel: Northern blot of RNA samples from (a) and (b), with probes targeting the indicated 23S and 16S chloroplast rRNA fragments. Samples from independent biological replicates are shown. Bottom panels: methylene green stain serving as loading control.

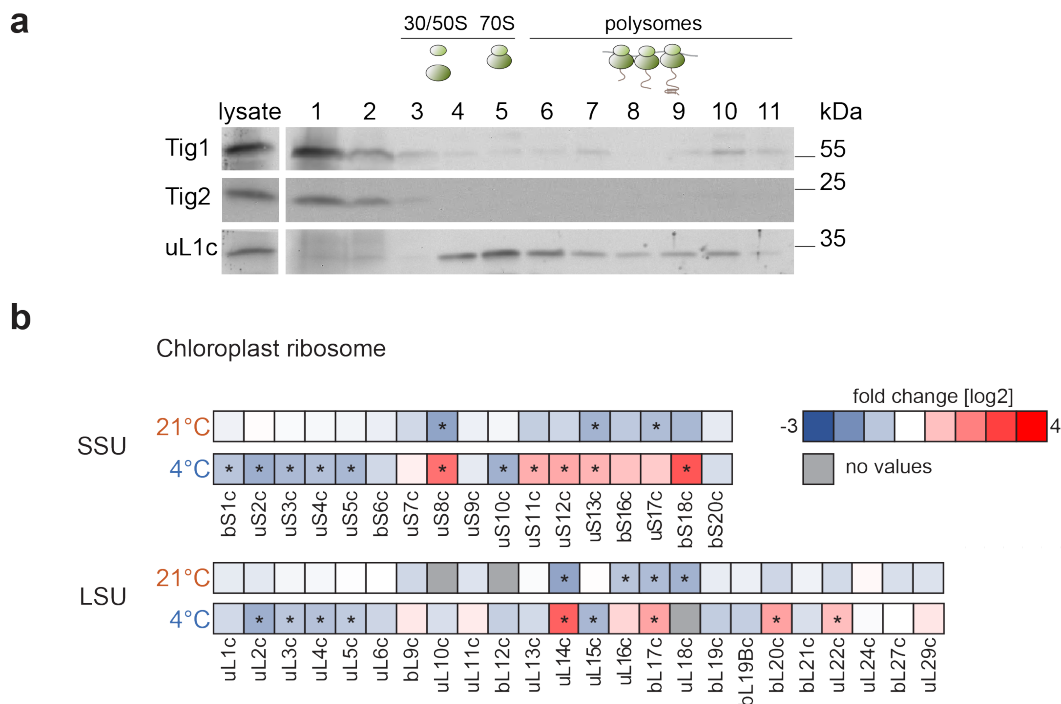

**Figure S14: Polysome analysis and differential enrichment of cytosolic and plastidic ribosomal proteins between Col-0 and *tig2* samples**

**a** Sucrose gradient fractionation and immunoblotting of polysomes in lysates from seedlings that were grown under standard growth conditions. Approximate positions of unassembled subunits including monosomes and polysomes in the gradient are illustrated by cartoons above the blots ( $n = 3$ ). **b** Mass spectrometric quantification of ribosomal proteins from the small subunit (SSU) and the large subunit (LSU), respectively that were present in ribosomal pellets. Col-0 and *tig2* lines were kept for 21 days in the cold (4°C) or at standard conditions (21°C) for one week. Heatmaps represent fold-change differences ( $\log_2$ ) between Col-0 and *tig2* lines.

## Supplementary Tables

**Table S1.** Trigger factor 1 and Trigger factor 2 sequences of selected plant species

| Name <sup>1</sup> | Species                        | Gene Model       | Accession Number (UniProt) <sup>2</sup> | N-domain <sup>3</sup>              | Predicted Transit Peptide <sup>4</sup> |
|-------------------|--------------------------------|------------------|-----------------------------------------|------------------------------------|----------------------------------------|
| PpTIG1            | <i>Physcomitrium patens</i>    | Phpat.011G039900 | A0A714A568                              | A <sub>100</sub> -D <sub>234</sub> | 99                                     |
| PpTIG2            | <i>Physcomitrium patens</i>    | Pp3c14_20300V3   | A0A2K1JJ9                               | A <sub>70</sub> -A <sub>250</sub>  | 69                                     |
| SfTIG1            | <i>Sphagnum fallax</i>         | Sphfalx0093s0024 |                                         | A <sub>93</sub> -D <sub>227</sub>  | 92                                     |
| SfTIG2            | <i>Sphagnum fallax</i>         | Sphfalx0027s0120 |                                         | I <sub>73</sub> -S <sub>244</sub>  | 72                                     |
| AtTIG1            | <i>Arabidopsis thaliana</i>    | At5g55220        | Q8S9L5                                  | A <sub>77</sub> -D <sub>214</sub>  | 76                                     |
| AtTIG2            | <i>Arabidopsis thaliana</i>    | At2g30695        | Q945Q5                                  | C <sub>55</sub> -S <sub>198</sub>  | 54                                     |
| CgTIG1            | <i>Capsella grandiflora</i>    | Cagra.2897s0023  |                                         | A <sub>80</sub> -D <sub>217</sub>  | 79                                     |
| CgTIG2            | <i>Capsella grandiflora</i>    | Cagra.6622s0002  |                                         | C <sub>55</sub> -S <sub>199</sub>  | 54                                     |
| BdTIG1            | <i>Brachypodium distachyon</i> | Bradi1g42820     | I1GYS7                                  | A <sub>59</sub> -D <sub>192</sub>  | 58                                     |
| BdTIG2            | <i>Brachypodium distachyon</i> | Bradi2g57530     | A0A0Q3GIQ1                              | S <sub>63</sub> -S <sub>249</sub>  | 62                                     |
| PtTIG1            | <i>Populus trichocarpa</i>     | Potri.015G065900 | B9IEG6                                  | S <sub>61</sub> -D <sub>195</sub>  | 60                                     |
| PtTIG2            | <i>Populus trichocarpa</i>     | Potri.013G125500 | A0A2K1Y4X4                              | A <sub>62</sub> -T <sub>210</sub>  | 61                                     |
| ZmTIG1            | <i>Zea mays</i>                | GRMZM2G127393    | K7TWH1                                  | A <sub>62</sub> -D <sub>195</sub>  | 61                                     |
| ZmTIG2            | <i>Zea mays</i>                | GRMZM2G109526    | B4FYP9                                  | S <sub>75</sub> -E <sub>249</sub>  | 74                                     |
| OsTIG1            | <i>Oryza sativa</i>            | Os06g20320       | A2YC62                                  | A <sub>69</sub> -D <sub>204</sub>  | 68                                     |
| OsTIG2            | <i>Oryza sativa</i>            | Os01g0894700     | Q5JLV2                                  | A <sub>62</sub> -T <sub>S229</sub> | 58                                     |

<sup>1</sup> Names are according to <sup>2</sup>. TIG1 proteins represent proteins containing a N-terminal ribosome-binding-domain, a peptidyl-prolyl isomerase domain and a C-terminal chaperone domain.

<sup>2</sup> UniProt protein accession numbers are given only for sequences with a 100% match by BLAST search.

<sup>3</sup> Sequence of the predicted N-terminal domain is given as amino acid single letter code. The position was determined based on sequence alignments.

<sup>4</sup> Predicted transit peptide length was determined by TargetP and ChloroP and validated by alignments <sup>7,8</sup>.



**Table S2: Primers used for cloning in this study**

| Primer #       | Used for cloning of                  | 5' - 3' Sequence                                   |
|----------------|--------------------------------------|----------------------------------------------------|
| Tig2NdeI-F     | Heterologous Tig2 expression         | GGCCGCATATGTGTGCTGCACCATCAGATGT                    |
| Tig2EcoRI-R    | Heterologous Tig2 expression         | GGTGGGAATTCTCAACTCGCTTCTTGAAGCTTT                  |
| Salk_037730_LP | SALK037730 validation                | GTCAGAGGGAAGATTAGTCC                               |
| Salk_037730_RP | SALK037730 validation                | AGGTTGAATATGGTGTCTGCAG                             |
| Salk_110999_LP | SALK110999 validation                | TTGTACATGCACCTGTCTCAAG                             |
| Salk_110999_RP | SALK110999 validation                | TTCGTTTCATCTCCGACTCTC                              |
| LBb1.3(T-DNA)  | SALK037730 and SALK110999 validation | ATTTTGCCGATTTTCGGAAC                               |
| TIG1-GFP-F     | Tig1-GFP expression                  | AACAGGTCTCAGGCTCAACAATGGAGCTCTGTGTTATC<br>AGCACG   |
| TIG1-GFP-R     | Tig1-GFP expression                  | AACAGGTCTCTCTGAACGAGTGATGTATTGAATCTCGG<br>CTCGG    |
| TIG2-GFP-F     | Tig2-GFP expression                  | AACAGGTCTCAGGCTCAACAATGCAGACAATCATCCAC<br>AGTCTCTC |
| TIG2-GFP-R     | Tig2-GFP expression                  | AACAGGTCTCTCTGAACTCGCTTCTTGAAGCTTTATAGT<br>AGC     |

**Table S3: Antibodies used in this study**

| Target    | Source                                                                                                                                                              | Reference  |
|-----------|---------------------------------------------------------------------------------------------------------------------------------------------------------------------|------------|
| uL1c      | own production                                                                                                                                                      | 2          |
| AtTig1    | own production                                                                                                                                                      | 6          |
| AtTig2    | own production, raised against the mature chloroplast Tig2 protein (lacking the 54 amino acids of the chloroplast transit peptide) from <i>Arabidopsis thaliana</i> | this study |
| GFP       | mouse monoclonal antibody, Roche (#11 814 460 001)                                                                                                                  | -          |
| PsaA      | polyclonal rabbit antibody, Agrisera (#AS06 172)                                                                                                                    | -          |
| uL12c     | J.-D.Rochaix/S. Ramundo                                                                                                                                             | 9          |
| PsbA/D1   | polyclonal rabbit antibody, Agrisera (#AS05 084)                                                                                                                    | -          |
| PbsC/CP43 | polyclonal rabbit antibody, Agrisera (#AS11 1787)                                                                                                                   | -          |
| Rbcl      | own production                                                                                                                                                      | 2          |

## References

- 1 Pettersen, E. F. *et al.* UCSF Chimera--a visualization system for exploratory research and analysis. *J Comput Chem* **25**, 1605-1612 (2004). <https://doi.org:10.1002/jcc.20084>
- 2 Ries, F. *et al.* Structural and molecular comparison of bacterial and eukaryotic trigger factors. *Sci Rep* **7**, 10680 (2017). <https://doi.org:10.1038/s41598-017-10625-2>
- 3 Waese, J. *et al.* ePlant: Visualizing and Exploring Multiple Levels of Data for Hypothesis Generation in Plant Biology. *Plant Cell* **29**, 1806-1821 (2017). <https://doi.org:10.1105/tpc.17.00073>
- 4 Nakabayashi, K., Okamoto, M., Koshiba, T., Kamiya, Y. & Nambara, E. Genome-wide profiling of stored mRNA in Arabidopsis thaliana seed germination: epigenetic and genetic regulation of transcription in seed. *Plant J* **41**, 697-709 (2005). <https://doi.org:10.1111/j.1365-313X.2005.02337.x>
- 5 Schmid, M. *et al.* A gene expression map of Arabidopsis thaliana development. *Nat Genet* **37**, 501-506 (2005). <https://doi.org:10.1038/ng1543>
- 6 Rohr, M. *et al.* The role of plastidic trigger factor serving protein biogenesis in green algae and land plants. *Plant Physiol* (2019). <https://doi.org:10.1104/pp.18.01252>
- 7 Emanuelsson, O., Nielsen, H., Brunak, S. & von Heijne, G. Predicting subcellular localization of proteins based on their N-terminal amino acid sequence. *J Mol Biol* **300**, 1005-1016 (2000). <https://doi.org:10.1006/jmbi.2000.3903>
- 8 Emanuelsson, O., Nielsen, H. & von Heijne, G. ChloroP, a neural network-based method for predicting chloroplast transit peptides and their cleavage sites. *Protein Sci* **8**, 978-984 (1999). <https://doi.org:10.1110/ps.8.5.978>
- 9 Ramundo, S. *et al.* Conditional Depletion of the Chlamydomonas Chloroplast ClpP Protease Activates Nuclear Genes Involved in Autophagy and Plastid Protein Quality Control. *Plant Cell* **26**, 2201-2222 (2014). <https://doi.org:10.1105/tpc.114.124842>
