# Supplementary material for: A truncated variant of the ribosome-associated trigger factor specifically contributes to plant chloroplast ribosome biogenesis
Source: PubMed Central journal article supplement (PMC11731035; doi:10.1038/s41467-025-55813-1), 2025-01-13
Supplement: 41467_2025_55813_MOESM3_ESM.pdf [file 41467_2025_55813_MOESM3_ESM.pdf]

## Description of Additional Supplementary Files

### **Supplementary Data 1: Proteomics data with identified and quantified proteins.**

**Tab 1:** Comparison of whole cell lysate from Col-0 and *tig2* lines grown at 22°C or exposed for 3 weeks at 4°C.

**Tab 2:** Comparison of proteins that were identified in ribosomal pellets of Col-0 and *tig2* lines after exposure for 3 weeks at 4°C. Ribosomal pellets resulted from ultracentrifugation of cell lysate through a 25% sucrose cushion.

**Tab 3:** Comparison of proteins that were identified in ribosomal pellets of Col-0 and *tig2*, grown at 22°C. Ribosomal pellets resulted from ultracentrifugation of cell lysate through a 25% sucrose cushion.
